# Supplementary material
Source: Springer Nature journal article supplement (https://www.springermedizin.de/resource/supplementary/12993_2011_366_MOESM5_ESM.pdf/9617630)
Supplement: MOESM5 [file 9617630]

**A)****Distance first 5min Activity meter**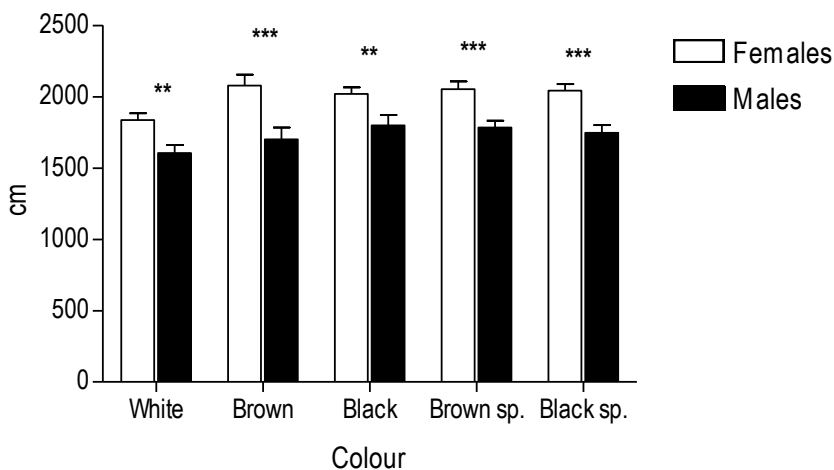

Post hoc Duncan's test ( $p < 0.05$ ) for "Colour":  
 "White" is different from all other colour groups

**B)****Distance last 5min Activity meter**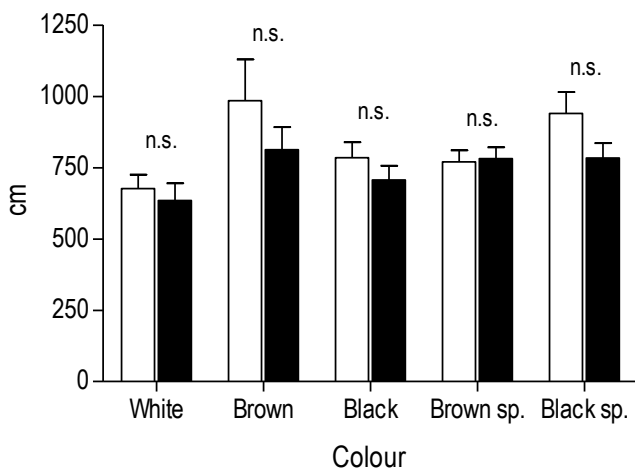

Post hoc Duncan's test ( $p < 0.05$ ) for "Colour":  
 "White" is different from "Brown" and "Black sp"
